# Supplementary material for: Association of the CFTR gene with asthma and airway mucus hypersecretion
Source: PLoS One. 2021 Jun 4;16(6):e0251881. doi: 10.1371/journal.pone.0251881 (PMC8177500; doi:10.1371/journal.pone.0251881)
Supplement: S2 Appendix — (ZIP) [file pone.0251881.s002.zip]

Archive with 2 entries (2 files):
- Anonymous data.xlsx
- en_statement sample representativeness.pdf
